# Supplementary material
Source: publisher figshare collection journal article supplement (https://frontiersin.figshare.com/ndownloader/files/25737032)
Supplement: Supplementary file [file 25737032]

**Supplemental Table 3.** Display of the most significant functions for the top 5 networks identified within the inferred NUP155 protein-protein interactions.

| Network | Score | Top Associated Network Functions                                                                                   |
|---------|-------|--------------------------------------------------------------------------------------------------------------------|
| 1       | 59    | Molecular Transport, RNA Trafficking, RNA Post-Transcriptional Modification                                        |
| 2       | 56    | Molecular Transport, RNA Trafficking, RNA Post-Translational Modification                                          |
| 3       | 56    | RNA Post-Transcriptional Modification, Molecular Transport, RNA Trafficking                                        |
| 4       | 53    | Cellular Assembly & Organization, Cell-To-Cell Signaling & Interaction, Reproductive System Development & Function |
| 5       | 50    | Cellular Assembly & Organization, RNA Post-Transcriptional Modification, Post-Translational Modification           |

Note: Functional significance analysis based on IPA Ingenuity Knowledge Base.
